# Supplementary material for: Adsorption Behavior of the L-Theanine onto Cation Exchange Resin ZGSPC106Na and D001SD
Source: MDPI journal article supplement (doi:10.3390/foods11223625), 2022-11-13
Supplement: s1 [file s1]

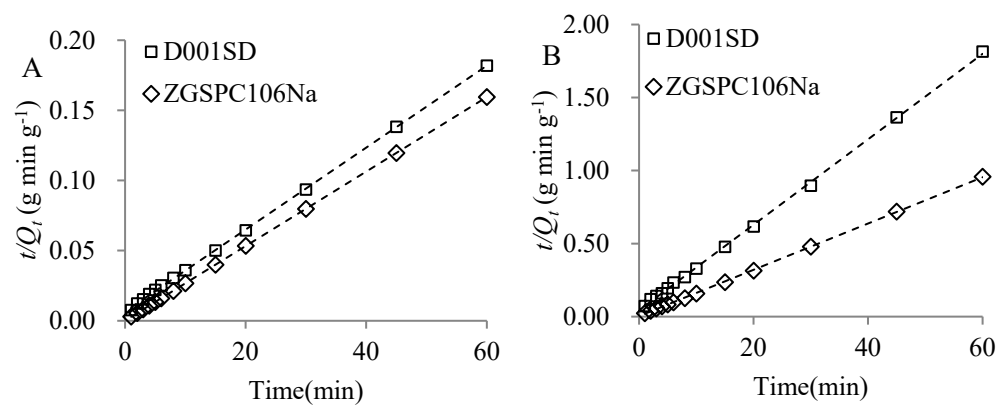

**Figure S1.** Fitness of the pseudo-second-order model for the adsorption of L-theanine(A) and caffeine (B) onto cation exchange resin.
